# Supplementary material for: Synergistic interactions of binary suspensions of magnetic anisotropic particles
Source: Royal Society of Chemistry journal article supplement (doi:10.1039/d2sm01234k), 2022-12-19
Supplement: d2sm01234k1.pdf [file d2sm01234k1.pdf]

## Synergistic interactions of binary suspensions of magnetic anisotropic particles - Supplementary Information<sup>†</sup>

Thomas Thelen,<sup>a‡</sup> Adriana Jara,<sup>a‡</sup> and Isaac Torres-Díaz<sup>a\*</sup>

### 1 The magnetic field of a uniformly magnetized ellipsoid

The magnetic potential outside the ellipsoidal particle ( $\xi > 0$ ) generated by the magnetization along the  $x$ -axis of the particle results<sup>1</sup>

$$\phi = \frac{r_x r_y r_z}{2} x M_x \int_{\xi}^{\infty} \frac{1}{(\alpha + r_x^2) \sqrt{(\alpha + r_x^2)(\alpha + r_y^2)(\alpha + r_z^2)}} d\alpha. \quad (1)$$

Rearranging it, results

$$\phi = -\frac{r_x r_y r_z}{2} x (L_{r_x}(\xi) - L_{r_x}(\infty)) M_x. \quad (2)$$

The magnetic field at position  $\xi$  outside the particle results equal to the negative gradient of the magnetic potential. The components of the magnetic field due to the magnetization along the  $x$ -direction results

$$H_x = \frac{r_x r_y r_z}{2} (L_{r_x}(\xi) - L_{r_x}(\infty)) M_x + \frac{r_x r_y r_z}{2} x \frac{\partial L_{r_x}(\xi)}{\partial x} M_x \quad (3)$$

$$H_y = \frac{r_x r_y r_z}{2} x \frac{\partial L_{r_x}(\xi)}{\partial y} M_x, \quad (4)$$

$$H_z = \frac{r_x r_y r_z}{2} x \frac{\partial L_{r_x}(\xi)}{\partial z} M_x. \quad (5)$$

Similarly, the magnetic potentials due to the magnetization along the  $y$  and  $z$  particle axes result in a similar functionality to Eq. (2). The magnetic field components due to the magnetization along the  $y$ -direction results

$$H_x = \frac{r_x r_y r_z}{2} y \frac{\partial L_{r_y}(\xi)}{\partial x} M_y, \quad (6)$$

$$H_y = \frac{r_x r_y r_z}{2} (L_{r_y}(\xi) - L_{r_y}(\infty)) M_y + \frac{r_x r_y r_z}{2} y \frac{\partial L_{r_y}(\xi)}{\partial y} M_y, \quad (7)$$

$$H_z = \frac{r_x r_y r_z}{2} y \frac{\partial L_{r_y}(\xi)}{\partial z} M_y. \quad (8)$$

The magnetic field components due to the magnetization along the  $z$ -direction results,

$$H_x = \frac{r_x r_y r_z}{2} z \frac{\partial L_{r_z}(\xi)}{\partial x} M_z, \quad (9)$$

$$H_y = \frac{r_x r_y r_z}{2} z \frac{\partial L_{r_z}(\xi)}{\partial y} M_z, \quad (10)$$

$$H_z = \frac{r_x r_y r_z}{2} M_z (L_{r_z}(\xi) - L_{r_z}(\infty)) + \frac{r_x r_y r_z}{2} z \frac{\partial L_{r_z}(\xi)}{\partial z} M_z. \quad (11)$$

<sup>a</sup> Department of Chemical and Materials Engineering, The University of Alabama in Huntsville, Huntsville, AL 35899. Tel: +1-256-824-3596.

<sup>†</sup> Electronic Supplementary Information (ESI) available: [details of any supplementary information available should be included here]. See DOI: 00.0000/00000000.

<sup>‡</sup> These authors contribute equally to this paper. \* Corresponding author: igd0002@uah.edu

Therefore, the external field to the particle due to a magnetization  $\mathbf{M} = (M_x, M_y, M_z)$  in an arbitrary direction in the particle frame results

$$\begin{aligned}
H_x &= \frac{r_x r_y r_z}{2} \left( [L_{r_x}(\xi) - L_{r_x}(\infty)] + x \frac{\partial L_{r_x}(\xi)}{\partial x} \right) M_x \\
&\quad + \frac{r_x r_y r_z}{2} \left( y \frac{\partial L_{r_y}(\xi)}{\partial x} \right) M_y \\
&\quad + \frac{r_x r_y r_z}{2} \left( z \frac{\partial L_{r_z}(\xi)}{\partial x} \right) M_z,
\end{aligned} \tag{12}$$

$$\begin{aligned}
H_y &= \frac{r_x r_y r_z}{2} \left( x \frac{\partial L_{r_x}(\xi)}{\partial y} \right) M_x \\
&\quad + \frac{r_x r_y r_z}{2} \left( [L_{r_y}(\xi) - L_{r_y}(\infty)] + y \frac{\partial L_{r_y}(\xi)}{\partial y} \right) M_y \\
&\quad + \frac{r_x r_y r_z}{2} \left( z \frac{\partial L_{r_z}(\xi)}{\partial y} \right) M_z,
\end{aligned} \tag{13}$$

$$\begin{aligned}
H_z &= \frac{r_x r_y r_z}{2} \left( x \frac{\partial L_{r_x}(\xi)}{\partial z} \right) M_x \\
&\quad + \frac{r_x r_y r_z}{2} \left( y \frac{\partial L_{r_y}(\xi)}{\partial z} \right) M_y \\
&\quad + \frac{r_x r_y r_z}{2} \left( [L_{r_z}(\xi) - L_{r_z}(\infty)] + z \frac{\partial L_{r_z}(\xi)}{\partial z} \right) M_z.
\end{aligned} \tag{14}$$

Thus, the field outside the ellipsoidal particle with an arbitrarily oriented magnetization  $\mathbf{M}$  can be expressed as

$$\mathbf{H} = \frac{r_x r_y r_z}{2} \mathcal{G} \cdot \mathbf{M}, \tag{15}$$

where  $\mathcal{G}$  is a tensor, which is equivalent to the Green tensor in ellipsoidal coordinates with components

$$\mathcal{G}_{ij} = \delta_{ij} [L_{r_j}(\xi) - L_{r_j}(\infty)] + x_j \frac{\partial L_{r_j}(\xi)}{\partial x_i}, \tag{16}$$

where  $\delta_{ij}$  represents the identity tensor and  $L_{r_j}$  is a scalar function. Additionally,  $\frac{\partial L_{r_j}(\xi)}{\partial x_i} = \frac{\partial L_{r_j}(\xi)}{\partial \xi} \frac{\partial \xi}{\partial x_i}$ , and

$$\frac{\partial \xi}{\partial x_i} = \frac{2x_i}{(r_i^2 + \xi)} / \left( \frac{x^2}{(r_x^2 + \xi)^2} + \frac{y^2}{(r_y^2 + \xi)^2} + \frac{z^2}{(r_z^2 + \xi)^2} \right), \tag{17}$$

$$\frac{\partial L_{r_j}(\xi)}{\partial \xi} = F_{r_j}(\xi). \tag{18}$$

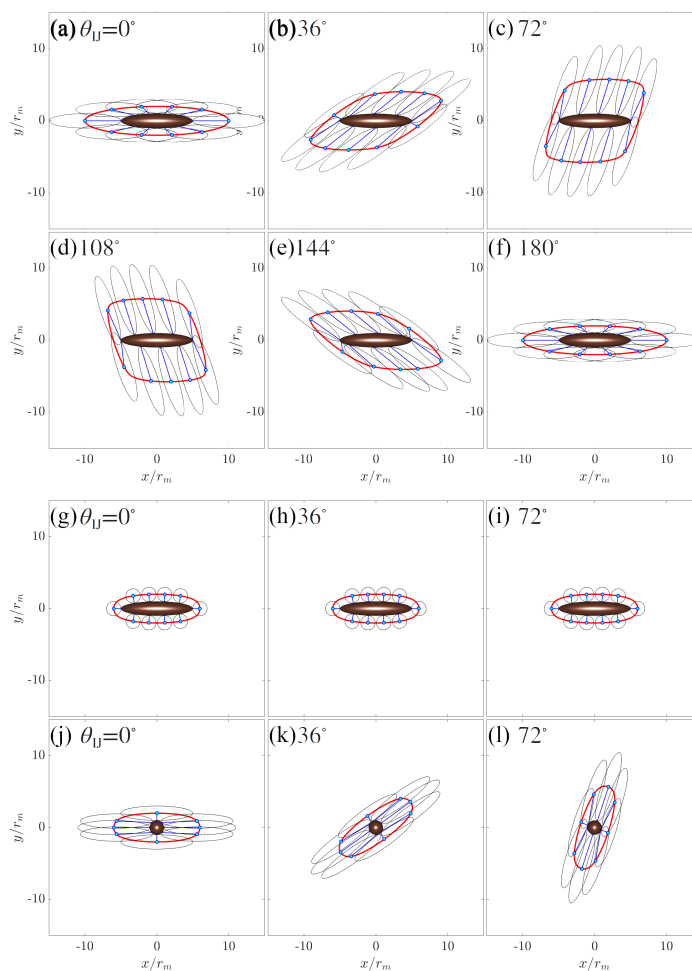

Fig. S 1 Excluded volume of (a)-(f) monodisperse ellipsoids and (g)-(l) binary ellipsoid-sphere systems with different orientations of particle J.

## Notes and references

- 1 J. A. Stratton, *Electromagnetic Theory*, McGraw-Hill Book Company, Inc., New York, 1941, p. 615.

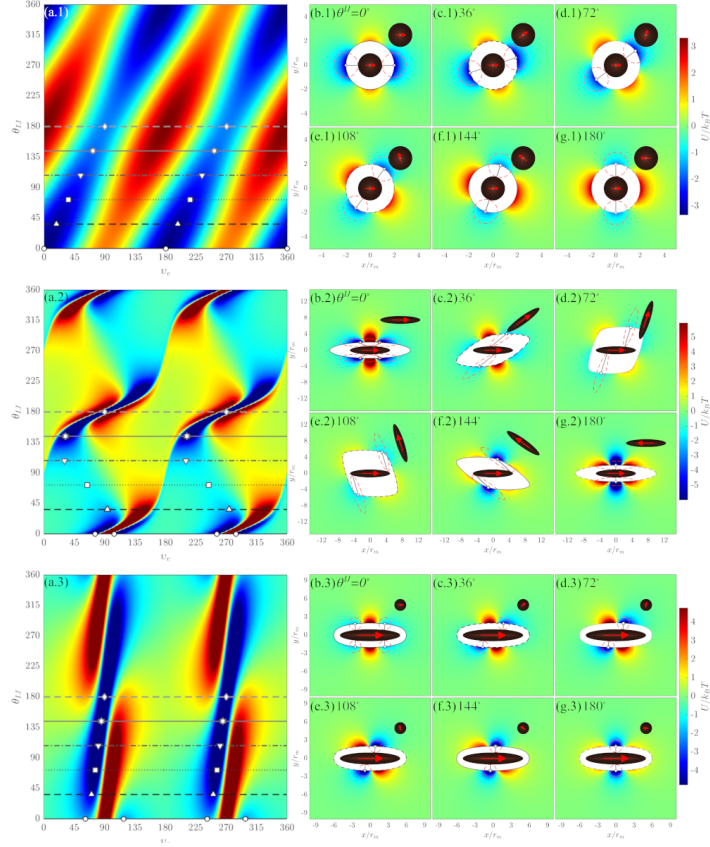

Fig. S 2 Dipolar interaction energy using point-dipole model between two magnetized ellipsoids ( $\beta_s = 10$ ) with different orientations and aspect ratios, (a1)-(g1)  $r_x/r_m = 1$ , (a2) - (g2) 5, and (a3) - (g3) 5 and 1. In both particles, the magnetization is aligned along the  $x$ -axis of the particle. The white area represents the excluded volume between particles at the corresponding orientation.

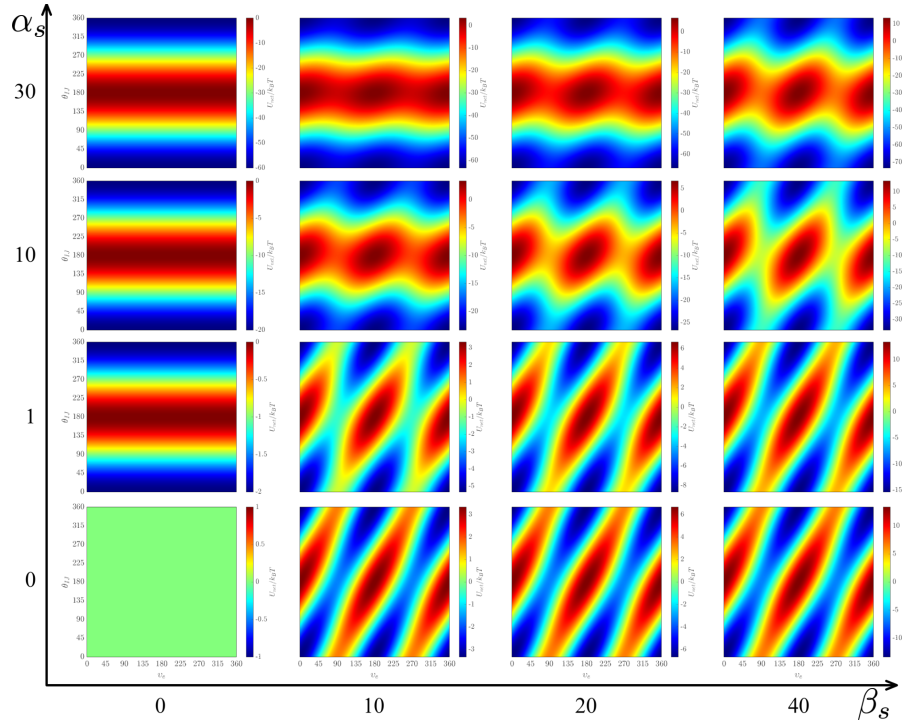

Fig. S 3 Dipolar interaction energy between two magnetized spheres  $r_x/r_m = 1$  as a function of dipole-dipole interaction parameter  $\beta_s$  and dipole-field interaction parameter  $\alpha_s$ . In both particles, the magnetization is aligned along the  $x$ -axis of the particle. The field is along the  $x$ -axis in the laboratory space.

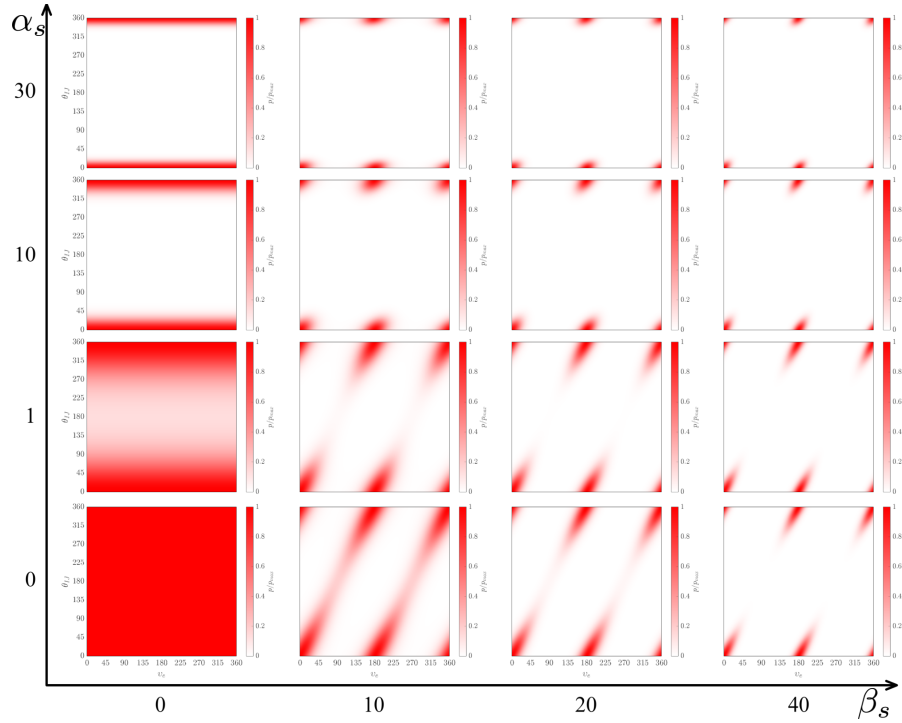

Fig. S 4 Normalized probability between two magnetized spheres  $r_x/r_m = 1$  as a function of dipole-dipole interaction parameter  $\beta_s$  and dipole-field interaction parameter  $\alpha_s$ . In both particles, the magnetization is aligned along the  $x$ -axis of the particle. The field is along the  $x$ -axis in the laboratory space.

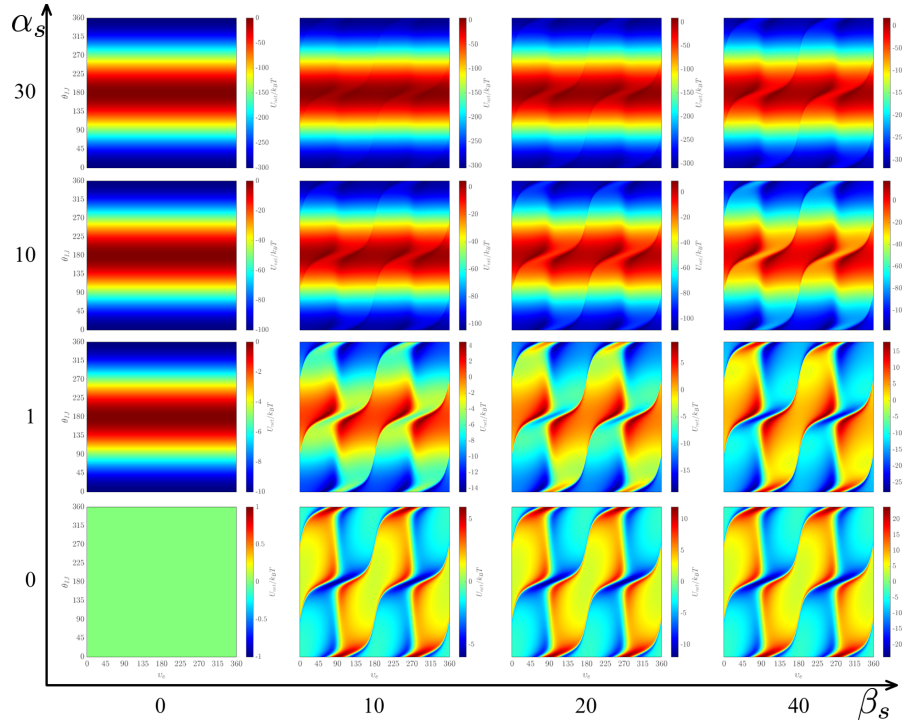

Fig. S 5 Dipolar interaction energy between two magnetized ellipsoids  $r_x/r_m = 5$  as a function of dipole-dipole interaction parameter  $\beta_s$  and dipole-field interaction parameter  $\alpha_s$ . In both particles, the magnetization is aligned along the  $x$ -axis of the particle. The field is along the  $x$ -axis in the laboratory space.

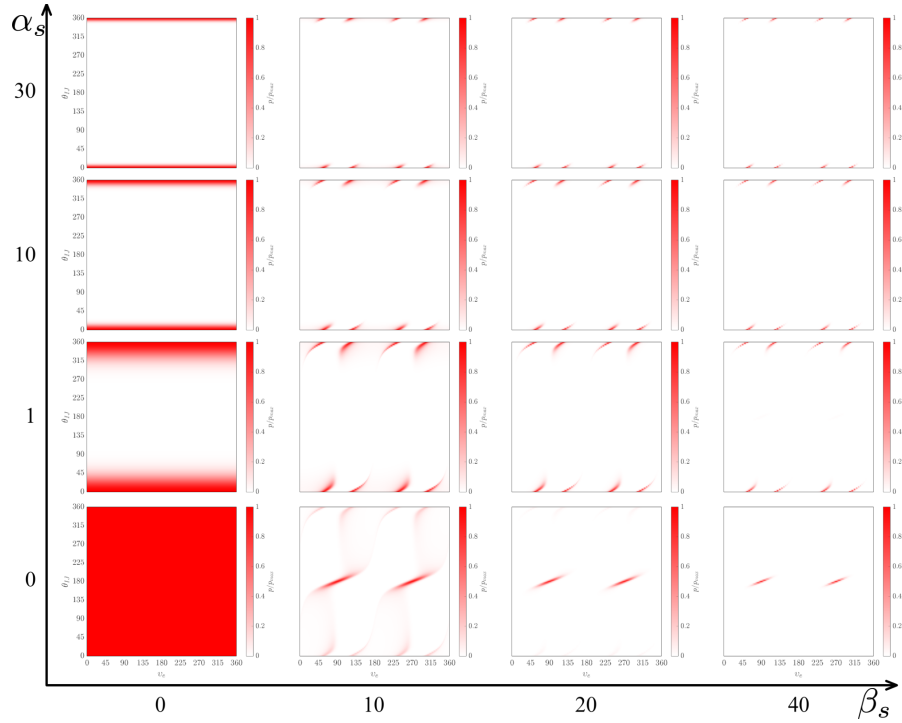

Fig. S 6 Normalized probability between two magnetized ellipsoids  $r_x/r_m = 5$  as a function of dipole-dipole interaction parameter  $\beta_s$  and dipole-field interaction parameter  $\alpha_s$ . In both particles, the magnetization is aligned along the  $x$ -axis of the particle. The field is along the  $x$ -axis in the laboratory space.

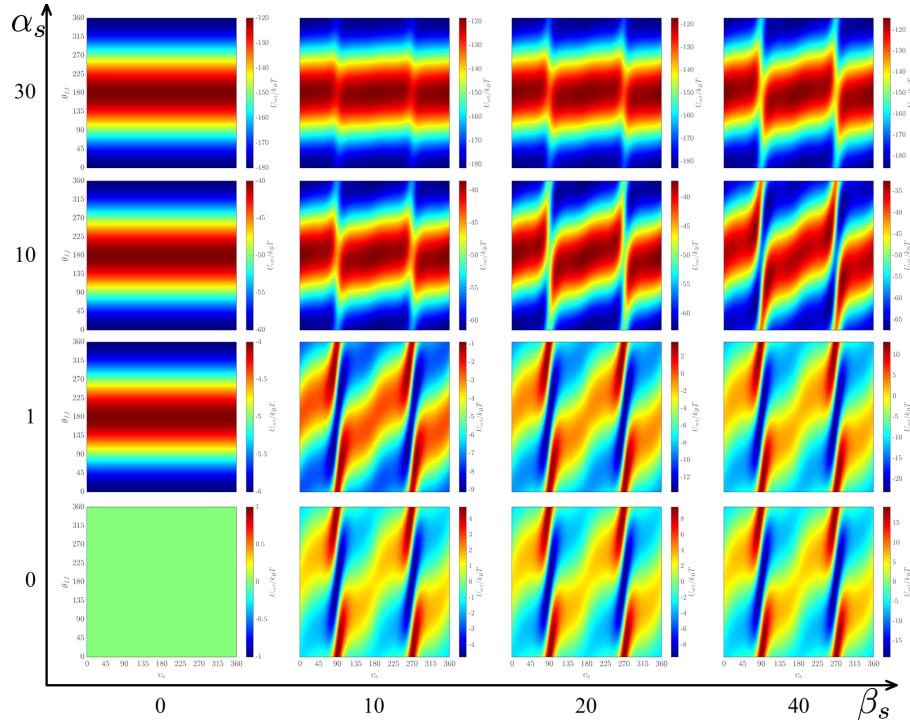

Fig. S 7 Dipolar interaction energy between a magnetized ellipsoid  $r_x/r_m = 5$  and a magnetized sphere  $r_x/r_m = 1$  as a function of dipole-dipole interaction parameter  $\beta_s$  and dipole-field interaction parameter  $\alpha_s$ . In both particles, the magnetization is aligned along the  $x$ -axis of the particle. The field is along the  $x$ -axis in the laboratory space.

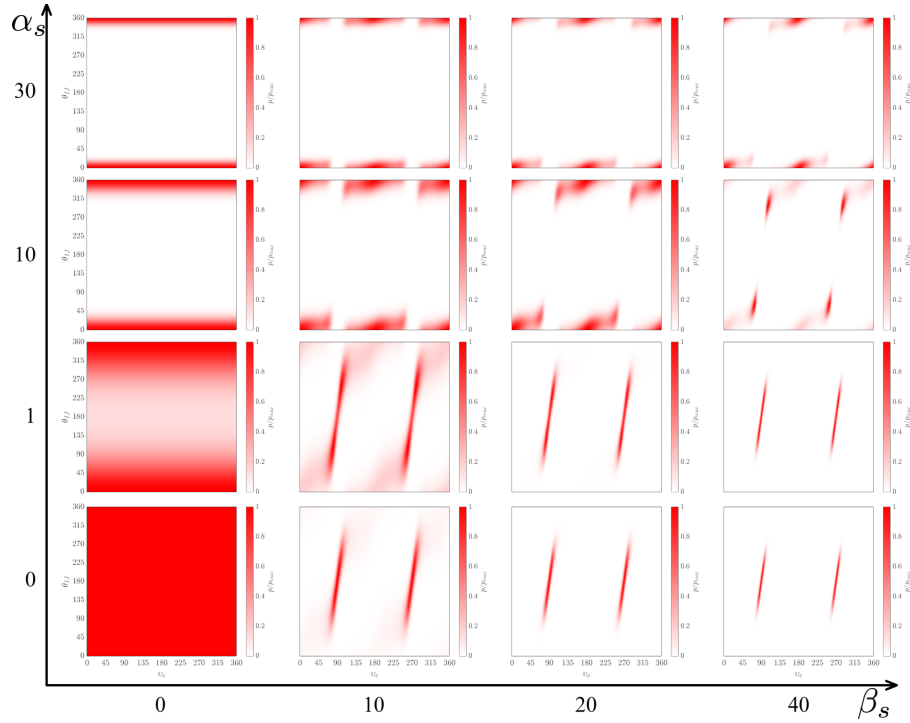

Fig. S 8 Normalized probability between a magnetized ellipsoid  $r_x/r_m = 5$  and a magnetized sphere  $r_x/r_m = 1$  as a function of dipole-dipole interaction parameter  $\beta_s$  and dipole-field interaction parameter  $\alpha_s$ . In both particles, the magnetization is aligned along the  $x$ -axis of the particle. The field is along the  $x$ -axis in the laboratory space.

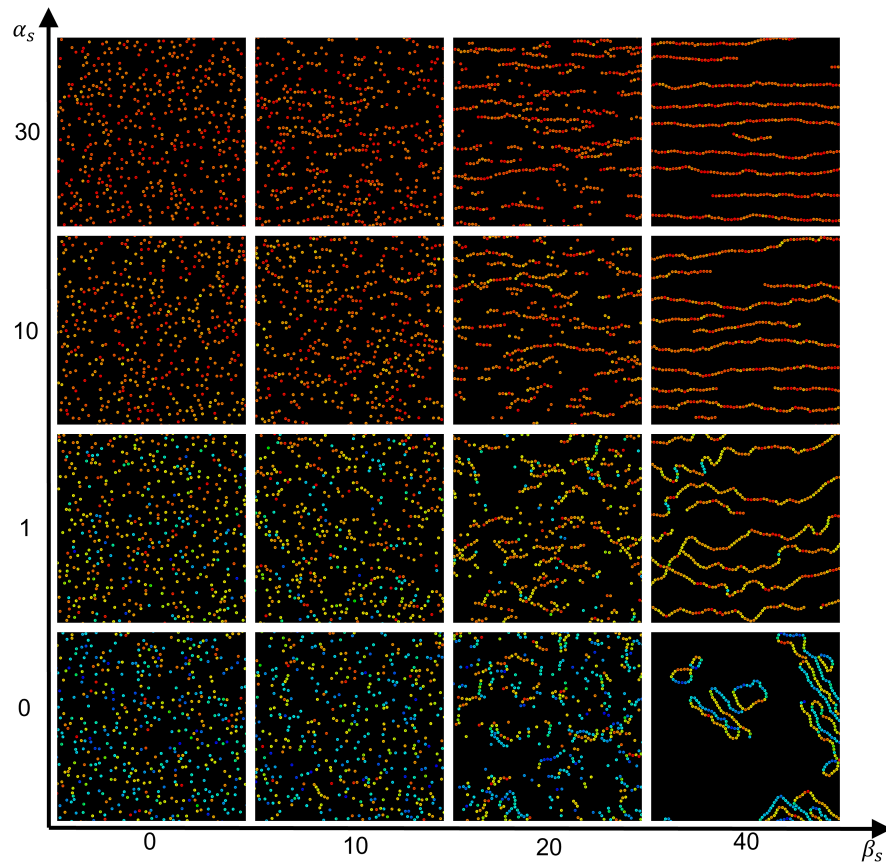

Fig. S 9 Snapshots of MC simulations for suspensions composed of spheres ( $r_x/r_m = 1$ ) in a two-dimensional confinement as a function of  $\alpha_s$  and  $\beta_s$ . The colorbar is as shown in Fig. 3.

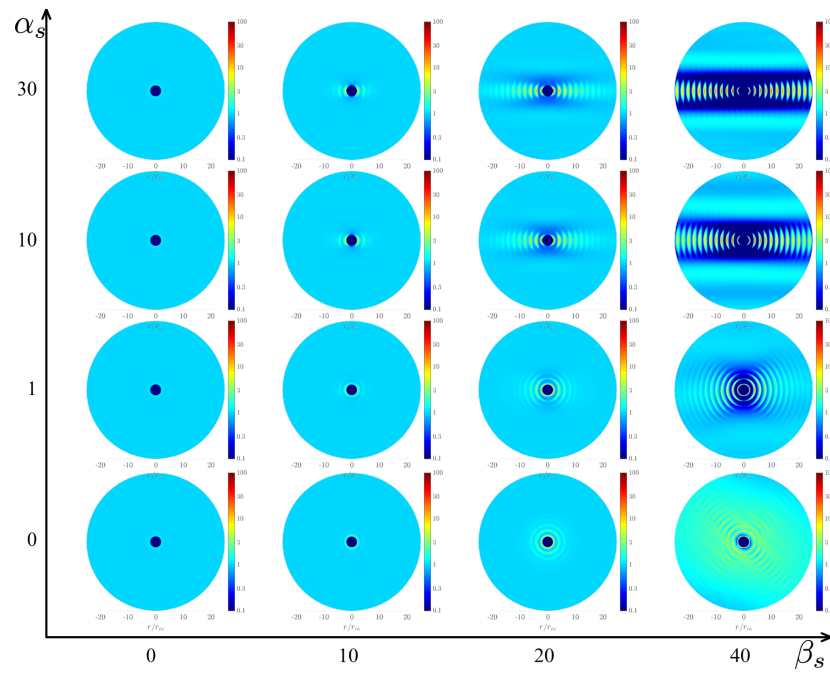

Fig. S 10 Pair distribution function for suspensions composed of spheres ( $r_x/r_m = 1$ ) in a two-dimensional confinement as a function of  $\alpha_s$  and  $\beta_s$ .



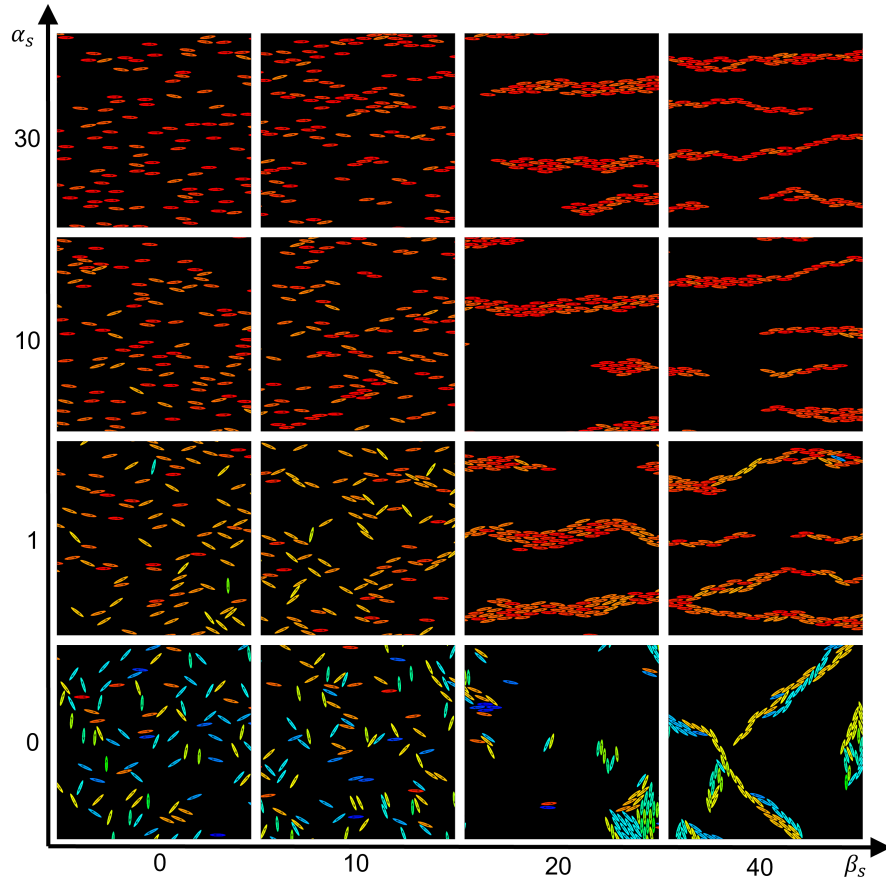

Fig. S 11 Snapshots of MC simulations for suspensions composed of ellipsoids ( $r_x/r_m = 5$ ) in a two-dimensional confinement as a function of  $\alpha_s$  and  $\beta_s$ . The colorbar is as shown in Fig. 3.

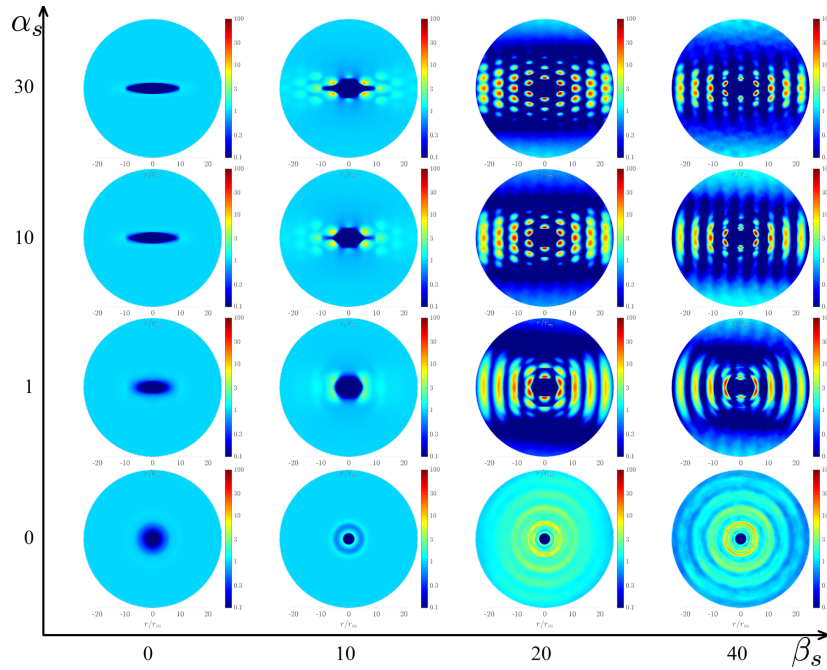

Fig. S 12 Pair distribution function for suspensions composed of ellipsoids ( $r_x/r_m = 5$ ) in a two-dimensional confinement as a function of  $\alpha_s$  and  $\beta_s$ .

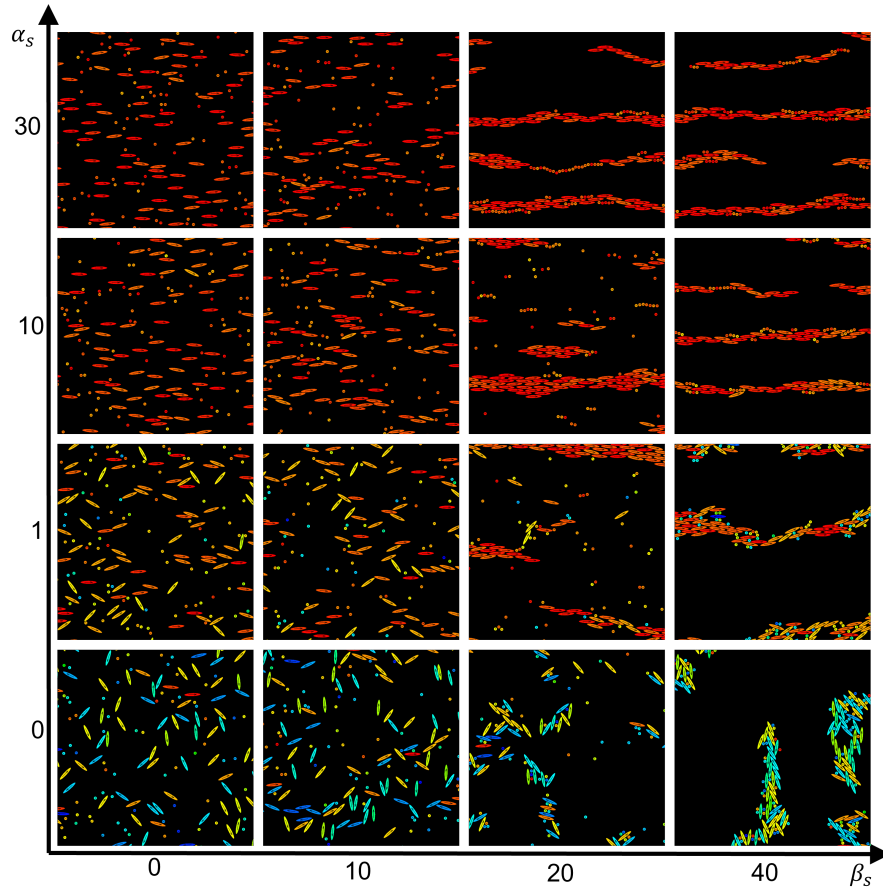

Fig. S 13 Snapshots of MC simulations for suspensions composed of a mixture of spheres ( $r_x/r_m = 1$ ) and ellipsoids ( $r_x/r_m = 5$ ) in a two-dimensional confinement as a function of  $\alpha_s$  and  $\beta_s$ . The colorbar is as shown in Fig. 3.

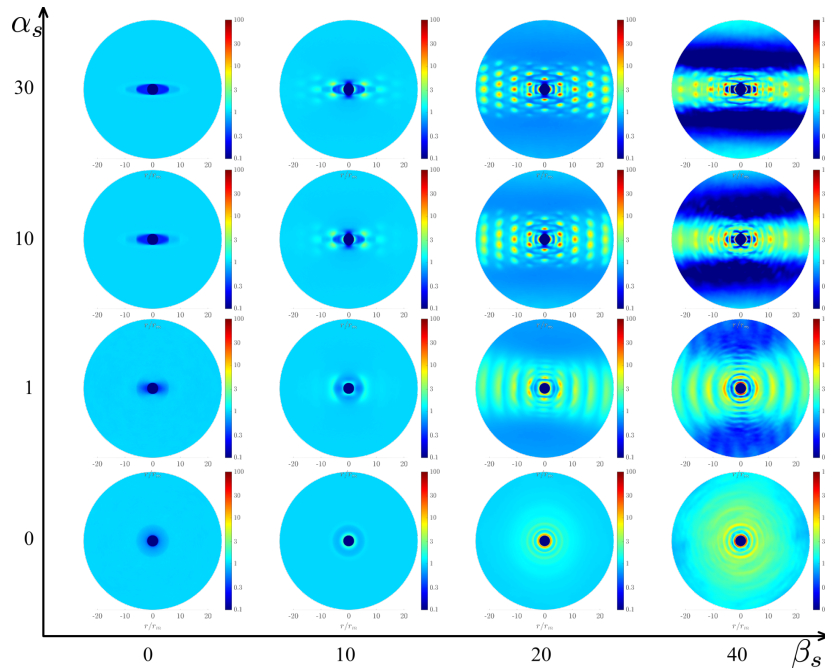

Fig. S 14 Pair distribution function for suspensions composed of a mixture of spheres ( $r_x/r_m = 1$ ) and ellipsoids ( $r_x/r_m = 5$ ) in a two-dimensional confinement as a function of  $\alpha_s$  and  $\beta_s$ .
